# Rural prioritization may increase the impact of COVID-19 vaccines in Sub-Saharan Africa due to ongoing internal migration: A modeling study

Prashanth Selvaraj<sup>a</sup>, Bradley G. Wagner<sup>a</sup>, Dennis L. Chao<sup>a</sup>, Maïna L'Azou Jackson<sup>b</sup>, J. Gabrielle Breugelmans<sup>c</sup>, Nicholas Jackson<sup>c</sup>, Stewart T. Chang<sup>a</sup>

<sup>a</sup>*Institute for Disease Modeling, Bill and Melinda Gates Foundation, Seattle, Washington, USA*

<sup>b</sup>*Coalition for Epidemic Preparedness and Innovations, Oslo, Norway*

<sup>c</sup>*Coalition for Epidemic Preparedness and Innovations, London, UK*

---

## Abstract

How COVID-19 vaccine is distributed within low- and middle-income countries has received little attention outside of equity or logistical concerns but may ultimately affect campaign impact in terms of infections, severe cases, or deaths averted. In this study we examined whether subnational (urban-rural) prioritization may affect the cumulative two-year impact on disease transmission and burden of a vaccination campaign using an agent-based model of COVID-19 in a representative Sub-Saharan Africa country setting. We simulated a range of vaccination strategies that differed by urban-rural prioritization, age group prioritization, timing of introduction, and final coverage level. Urban prioritization averted more infections in only a narrow set of scenarios, when internal migration rates were low and vaccination was started by day 30 of an outbreak. Rural prioritization was the optimal strategy for all other scenarios, e.g., with higher internal migration rates or later start dates, due to the presence of a large immunological naive rural popula-

*Preprint submitted to Lancet Global Health*

*June 19, 2021*

tion. Among other factors, timing of the vaccination campaign was important to determining maximum impact, and delays as short as 30 days prevented larger campaigns from having the same impact as smaller campaigns that began earlier. The optimal age group for prioritization depended on choice of metric, as prioritizing older adults consistently averted more deaths across all of the scenarios. While guidelines exist for these latter factors, urban-rural allocation is an orthogonal factor that we predict to affect impact and warrants consideration as countries plan the scale-up of their vaccination campaigns.

*Keywords:* COVID-19, vaccination, urban/rural transmission, serology, sub-Saharan Africa, vaccination impact, low and middle income countries

---

## 1 Introduction

2 COVID-19 has presented every country with a challenge to formulate  
3 a strategy to protect its population, initially with non-pharmaceutical in-  
4 terventions (NPI)/public health and safety measures (PHSM) and more re-  
5 cently vaccination. As of June 2021, the World Health Organization (WHO)  
6 has granted Emergency Use Listing to five vaccines [1], though supplies are  
7 expected to be limited, particularly in low- and middle-income countries  
8 (LMIC). The COVID-19 Vaccines Global Access (COVAX) Advance Market  
9 Commitment (AMC) is expected to be the primary mechanism by which  
10 most of 92 eligible LMICs procure COVID-19 vaccines, beginning with 3%  
11 population coverage for health care workers (HCW) and increasing to 20%  
12 population coverage for the elderly and adults with comorbidities [2]. Previ-  
13 ous modeling studies have indicated that prioritizing elderly adults for vac-

14 cination would yield the largest reductions in mortality [3, 4] given the steep  
15 gradient of mortality observed with age in China, Europe, and other coun-  
16 tries [5, 6]. Meanwhile, HCW have been prioritized to preserve health system  
17 capacity [2].

18 How countries should allocate vaccines subnationally has received little  
19 attention outside of equity or logistical considerations. While the WHO re-  
20 quires countries to submit national deployment and vaccination plans (ND-  
21 VPs) [7] prior to receiving vaccines from COVAX [8], WHO guidance on  
22 developing NDVPs mentions geography only in the context of ensuring equi-  
23 table access. In particular the guidance encourages countries to give special  
24 consideration to “those living in informal settlements or urban slums... pop-  
25 ulations in conflict settings or those affected by humanitarian emergencies,  
26 and other hard-to-reach population groups” but does not explore the epi-  
27 demiological impact of such policy decisions [7]. Likewise, WHO guidance  
28 on logistics mentions “remote areas” but only with respect to the ultra-low  
29 temperatures required to store certain vaccines and the need for special de-  
30 vices such as thermal shippers with dry ice [9]. These documents highlight  
31 the challenges that rural areas (and some urban areas) are expected to face  
32 during COVID-19 vaccination campaigns and suggest that the default may  
33 be to overlook these areas or distribute vaccine to these areas at a slower  
34 pace.

35 In this study we ask whether urban or rural prioritization of COVID-19  
36 vaccines may also affect the impact of the vaccination campaign on disease  
37 burden. Using an agent-based model set in a representative Sub-Saharan  
38 African (SSA) setting, we examine the possible impact on transmission and

39 disease burden of campaigns prioritizing urban or rural areas to receive vac-  
40 cine first, while also accounting for other factors such as age group prior-  
41 itization, variable dates of vaccine introduction, and final vaccine coverage  
42 levels.

## 43 **Results**

44 *Ongoing migration generates multiple peaks in COVID-19 incidence at the*  
45 *country level*

46 To explore possible COVID-19 trajectories in SSA, we created an agent-  
47 based model of the spread of COVID-19 in a SSA-like country setting where  
48 the population was split between urban and rural areas. The population  
49 was assumed to be immunologically naive, and NPI/PHSM policies were  
50 simulated as dynamic changes in transmission. Infections were seeded in the  
51 urban node and allowed to spread to rural nodes through internal urban-rural  
52 migration (Figure 1).

53 In the baseline scenario, moderate transmission and ongoing migration  
54 ( $R_0 = 2.4$ , migration = 20 000 daily trips per million individuals, dtpmi)  
55 resulted in separate incidence peaks in urban and rural areas which aggre-  
56 gated to give two peaks at the country level (Figure 1, middle column, middle  
57 row). Cases rose quickly in urban areas and more gradually in rural areas  
58 with urban and rural peaks separated by approximately four months. After  
59 two years, a majority of the overall population ( $58\% \pm 2\%$ ) had been infected  
60 at some point (Figure 2). A larger fraction of the urban population was ever  
61 infected (81% cumulative urban infections vs. 48% cumulative rural infec-  
62 tions), but rural infections outnumbered urban infections due to the larger

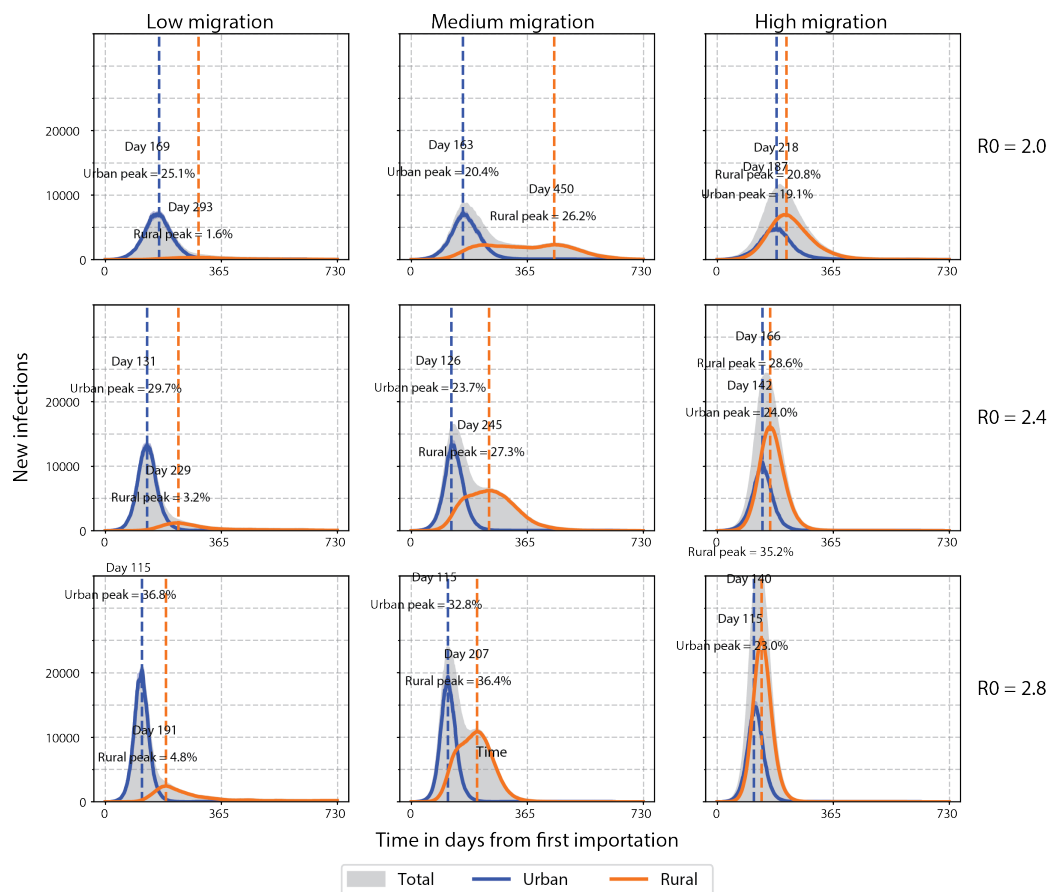

Figure 1: Daily COVID-19 incidence with varying transmission and migration in an archetypal SSA country setting. Urban and rural curves show new cases per day out of a population of 400 000 individuals split 40% urban and 60% rural. Peak percentages represent cumulative incidence as a percentage of the respective sub-population on the date when the highest incidence in each sub-population occurs indicated by the dashed vertical line. Time in days since first imported case. Low, medium, and high migration = 2000, 20 000, and 200 000 dtpmi, respectively.

63 rural population (Figure 2).

64 Using the baseline scenario as reference, we examined the effects of trans-  
 65 mission and migration separately on the epidemic characteristics (Figure 1).

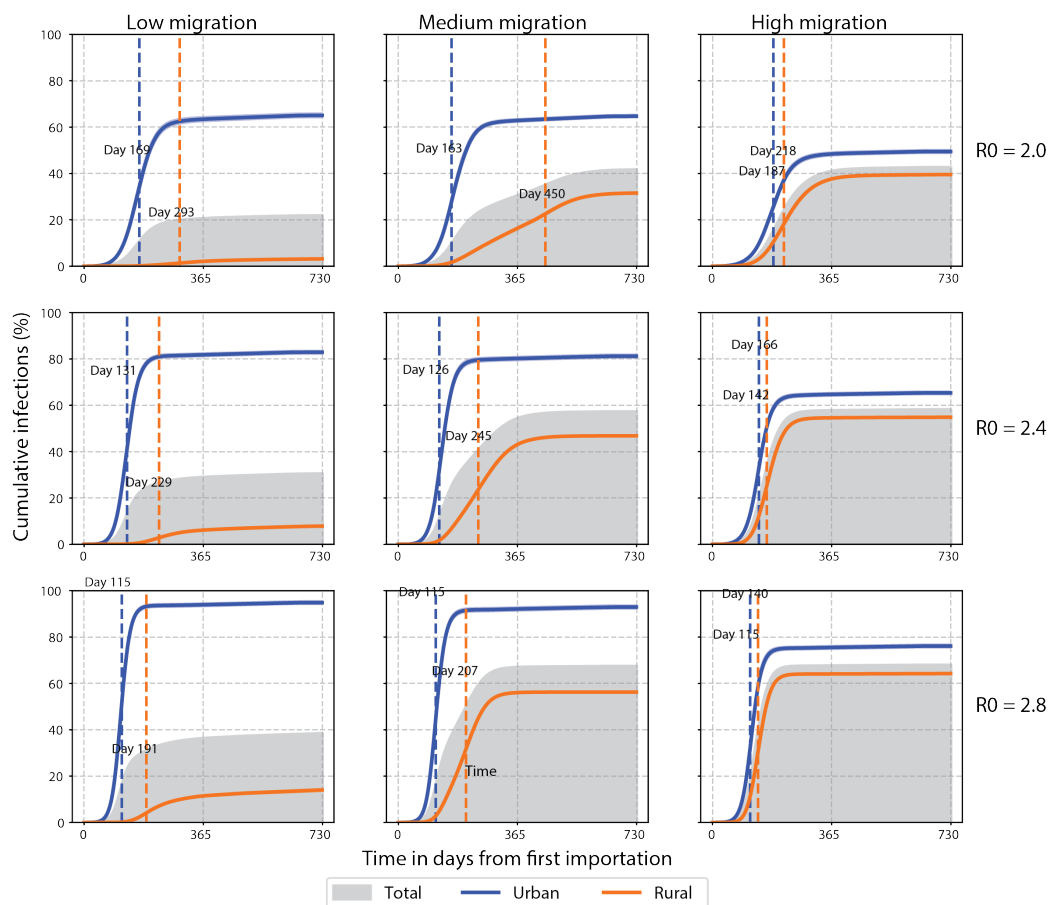

Figure 2: Cumulative COVID-19 incidence with varying transmission and migration in an archetypal SSA country. Urban and rural curves show percentage ever infected out of a population of 400 000 individuals split 40% urban and 60% rural. Peak percentages represent cumulative incidence as a percentage of the respective sub-population on the date when the highest incidence in each sub-population occurs indicated by the dashed vertical line. Time in days since first imported case. Low, medium, and high migration = 2000, 20 000, and 200 000 dtpmi, respectively.

66 Increasing the transmission rate (from  $R_0 = 2.0$  to 2.8) while holding mi-  
 67 gration constant shortened the time between urban and rural peaks (e.g.,

68 from 287 to 92 days when migration = 20 000 dtpmi, Figure 1). This also  
69 resulted in a proportional increase in cumulative incidence as expected (Fig-  
70 ure 2; however, other qualitative features such as the number of peaks at the  
71 country level remained unchanged (Figure 1).

72 By comparison, increasing the internal migration rate while holding trans-  
73 mission constant resulted in qualitative changes to the incidence curve includ-  
74 ing the number of peaks at the country level (Figure 1). At medium rates of  
75 migration (migration = 20 000 dtpmi), separate urban and rural peaks were  
76 apparent at the country level with any level of transmission (Figure 1). In  
77 this scenario, approximately equal numbers of cases came from urban and  
78 rural areas (Figure 2). At low rates of migration (migration = 2000 dtpmi),  
79 the outbreak was predominantly urban, with urban areas contributing the  
80 majority of cases (Figure 2). Rural incidence failed to increase appreciably  
81 but instead contributed to a long tail of declining incidence at the country  
82 level (Figure 1). Conversely, at high rates of migration (migration = 200 000  
83 dtpmi), a predominantly rural outbreak was observed, with rural areas con-  
84 tributing the majority of cases (Figure 2). Incidence increased in both urban  
85 and rural areas but continued increasing in rural areas even after starting to  
86 decline in urban areas (Figure 1). Therefore, both low and high migration  
87 rates tended to produce single-peak outbreaks, while intermediate migration  
88 rates resulted in multiple peaks, marking the transition between between  
89 predominantly urban and rural outbreaks.

90 At extreme values of transmission and migration, the model demonstrated  
91 two contrasting outbreak scenarios. A more contained, primarily urban out-  
92 break was generated when transmission and migration rates were low ( $R_0 =$

93 2.0 and migration = 2000 dtpmi); cumulative incidence was 62% and 5% in  
94 urban and rural areas, respectively, and  $22\% \pm 2\%$  at the country level (Fig-  
95 ure 2). A less contained, widespread outbreak was generated when transmis-  
96 sion and migration rates were high ( $R_0 = 2.8$  and migration = 200 000 dtpmi);  
97 cumulative incidence was 78% and 63% in urban and rural areas, respectively,  
98 and  $68\% \pm 2\%$  at the country level (Figure 2). This range of cumulative in-  
99 cidence was consistent with seroprevalence rates in SSA [10, 11, 12, 13, 14].

100 *Increasing coverage has a limited capacity to compensate for delays in COVID-*  
101 *19 vaccine introduction*

102 To examine the effect of COVID-19 vaccination policies on population-  
103 level impact, we simulated roll-out strategies that differed in several respects:  
104 age prioritization (i.e., older or younger adults first), timing (start day) of vac-  
105 cine introduction, final vaccine coverage level, and spatial prioritization (i.e.,  
106 urban or rural areas first). Vaccines were assumed to be either acquisition-  
107 blocking (preventing most infection after exposure) or disease-blocking (al-  
108 lowing infection and limited transmission but preventing most disease). Im-  
109 pact was evaluated on the basis of cumulative infections, severe cases, and  
110 deaths averted after two years compared to a counterfactual baseline scenario  
111 of moderate transmission and ongoing migration ( $R_0 = 2.4$ , migration = 20  
112 000 dtpmi).

113 We first asked what effect age prioritization and timing of introduction  
114 might have on vaccination impact (Figure 3). To simplify the analysis, we  
115 fixed vaccine coverage at 50% and distributed vaccine to both urban and  
116 rural areas with equal priority. We found that the optimal age prioritiza-  
117 tion strategy depended on the choice of impact metric. Prioritizing younger



118 adults to receive an acquisition-blocking vaccine averted more infections than  
119 prioritizing older adults or random distribution by age (e.g.,  $15\% \pm 3\%$  versus  
120  $13\% \pm 2\%$  and  $7\% \pm 2\%$ , respectively, when introduced at day 60, Figure 3,  
121 left column, top row), consistent with the large proportion of younger adults  
122 in SSA populations ([15]) and degree of contact that occurs within this age  
123 group ([16]). With a disease-blocking vaccine, prioritizing younger adults  
124 continued to be more effective in averting infections than prioritizing older  
125 adults, but the relative differences were reduced (Figure 3, left column, bot-  
126 tom row).

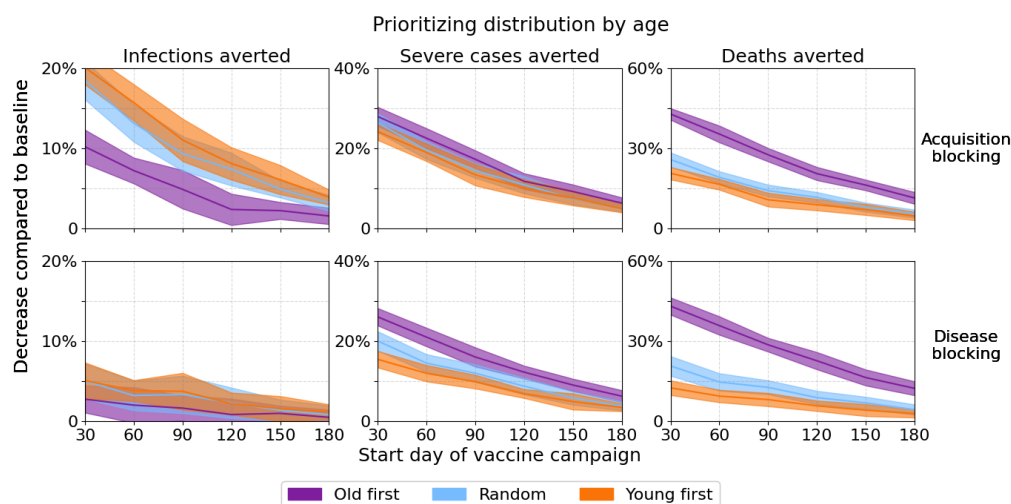

Figure 3: Vaccination impact by age prioritization and timing of vaccine introduction. Age groups for prioritization were as follows: “old first” = beginning with adults age 70 years or older; “young first” = beginning with adults age 15–49 years; “random” = without prioritization (i.e., all ages have equal priority).

127 By comparison, prioritizing older adults was consistently more effective  
128 at averting severe cases or deaths than prioritizing younger adults or random  
129 distribution by age. For an acquisition-blocking vaccine, prioritizing older

130 adults averted approximately twice as many deaths as prioritizing younger  
131 adults, regardless of date of introduction (Figure 3, right column, top row).  
132 These differences were greater in magnitude for a disease-blocking vaccine  
133 (Figure 3, right column, bottom row). Regardless of impact metrics, delays  
134 in vaccine introduction reduced but did not negate the absolute differences  
135 in impact between age prioritization strategies (Figure 3).

136 We then asked whether higher coverage levels could compensate for a  
137 later date of introduction. In this case, we assumed priority would go to  
138 older adults based on the deaths averted as a metric (Figure 4) and WHO  
139 fair allocation guidelines [2]. Final coverage levels were varied between 20%  
140 and 80% representing COVAX targets [2] and an optimistic scenario with ad-  
141 ditional vaccine procurement, respectively. Regardless of metric (infections,  
142 severe cases, or deaths averted) or start day of vaccination (30-180 days after  
143 first case), increasing vaccination coverage also increased the impact (Fig-  
144 ure 4).

145 The maximum possible impact for any given coverage level diminished  
146 rapidly with delays in the start of vaccination (Figure 4). An optimistic  
147 campaign with 80% coverage of an acquisition-blocking vaccine averted 16%  
148 of infections when introduced on day 30 but only 2% of infections when  
149 introduced on day 180. The impact of vaccination at other coverage levels was  
150 similarly diminished by delays in introduction (Figure 4). As a result, higher  
151 coverage levels were necessary for a campaign started later to have the same  
152 impact as a campaign started earlier with lower coverage levels. In certain  
153 cases, the gain from starting vaccination earlier could not be matched by  
154 delayed vaccination, even with very high final coverage levels. For example,

155 to avert the same number of deaths (32% of baseline deaths) as a campaign  
 156 started on day 30 with 30% coverage, a campaign started on day 90 would  
 157 need to attain 80% coverage (Figure 4, right column, top row). However,  
 158 campaigns started on day 30 with  $\geq 60\%$  coverage resulted in levels of impact  
 159 ( $\geq 44\%$  of baseline deaths averted) that could not be achieved by campaigns  
 160 started later, regardless of coverage level (examined up to 80% coverage)  
 161 (Figure 4, right column, top row).

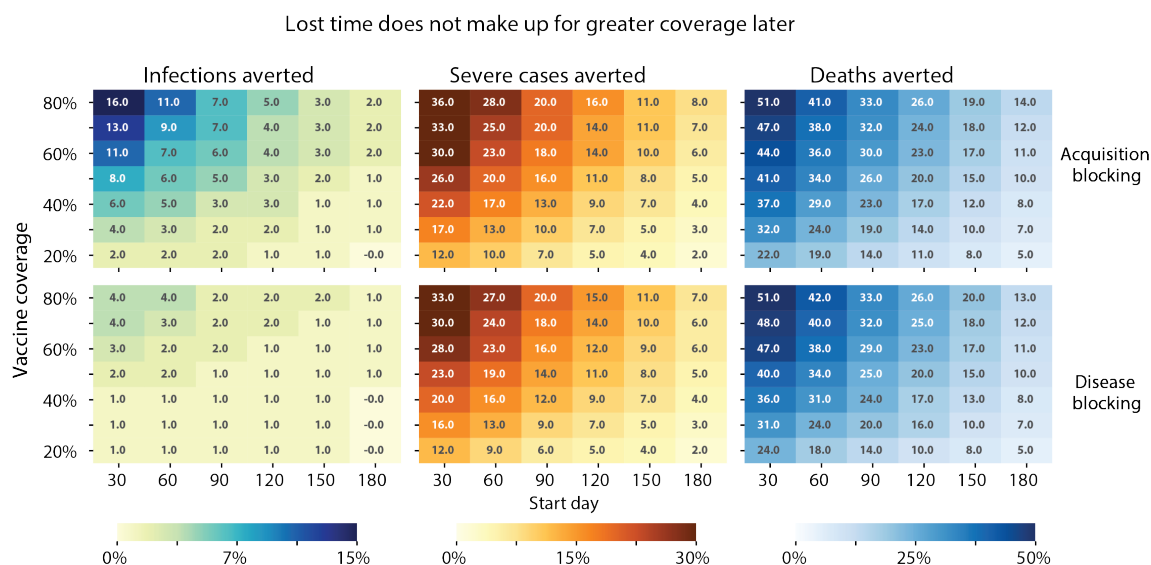

Figure 4: Vaccination campaign impacts by final coverage level and timing of vaccine introduction. Percentage reductions are shown for the respective cumulative indicator (infections, severe cases, or deaths) with respect to the baseline scenario without intervention.

162 Trends with respect to age prioritization, timing of introduction, and final  
 163 coverage levels were robust to choice of baseline scenarios, including changing  
 164 the level of transmission or ongoing migration (Supplementary Information).

165 *Rural prioritization optimizes vaccination in the presence of ongoing migra-*  
166 *tion*

167 Finally we asked to what extent spatial (urban or rural) prioritization  
168 could affect the impact of a COVID-19 vaccination campaign in an archety-  
169 pal SSA setting. We again assumed that priority would be given to older  
170 adults but that within each age tier, those in the prioritized spatial setting  
171 would be vaccinated first. For example, for rural prioritization, we assumed  
172 vaccine would go to rural individuals 70+ years, then urban 70+ years, ru-  
173 ral 60-69 years, and so on. We also varied final coverage levels (20%, 50%,  
174 or 80%), start dates of introduction (30, 90, or 180 days), and type of vac-  
175 cine (acquisition- or disease-blocking). For our counterfactual, we assumed  
176 a baseline of moderate transmission and ongoing migration ( $R_0 = 2.4$ , mi-  
177 gration = 20 000 dtpmi) or the extremes of a more confined or less confined  
178 outbreak ( $R_0 = 2.0$ , migration = 2000 dtpmi or  $R_0 = 2.8$ , migration = 200  
179 000 trips dtpmi, respectively) (cf. Figures 1, 2).

180 For the majority of vaccination scenarios, we found that rural priori-  
181 tization would avert more infections, severe cases, and deaths than urban  
182 prioritization (Figure 5). Urban prioritization achieved greater impact for  
183 a small set of conditions: when the outbreak was largely confined to urban  
184 areas (with low transmission and low migration) and vaccination was started  
185 early in the outbreak (by day 30) (Figure 5, left column). For all other sce-  
186 narios, including those with higher transmission or migration, or campaigns  
187 started at later dates, rural prioritization resulted in greater impact (Fig-  
188 ure 5, center and right columns). These differences were most pronounced  
189 when impact was measured by infections averted. For other metrics such as

190 severe cases (Figure 5, rows 2 and 5), the differences between urban and ru-  
191 ral prioritization tended to be modest but still significant, e.g., with medium  
192 transmission and migration ( $R_0 = 2.4$ , migration = 20 000 dtpmi, medium  
193 migration). This was attributable to the prolonged spread of the epidemic in  
194 such scenarios (Figure 1) as well as our assumption that age groups would be  
195 given priority over spatial distribution such that in all scenarios in Figure 5,  
196 older age groups were vaccinated first.

197 The acquisition-blocking vaccine had a higher impact on transmission  
198 than the disease-blocking vaccine, particularly when impact was measured  
199 by infections averted. However, differences in impact between the two vac-  
200 cine types were strongly dependent on transmission trajectories over time,  
201 coverage, and the start time of vaccine roll-out. In the low migration and low  
202 transmission scenario ( $R_0 = 2.0$ , migration = 2000 dtpmi), the two vaccines  
203 were largely similar. For example, for campaigns prioritizing urban areas  
204 started on day 30, both vaccines had negligible effects on infections averted  
205 with 20% final coverage. These differences increased to 7% of infections (10%  
206 and 3% with acquisition- and disease-blocking, respectively) with 80% final  
207 coverage (Figure 5, left column) and decreased with delays in the start date  
208 of vaccine roll-out. When transmission and migration were both higher ( $R_0$   
209 = 2.4, migration = 20 000 dtpmi, medium migration), the epidemic per-  
210 sisted longer (Figure 1), and larger magnitude differences between vaccine  
211 types were observed. For campaigns prioritizing rural areas started on day  
212 30, the difference between vaccine types was 3% of infections with 20% final  
213 coverage and 15% of infections with 80% final coverage (Figure 5, middle  
214 column). These modest absolute differences in impact were attributable to

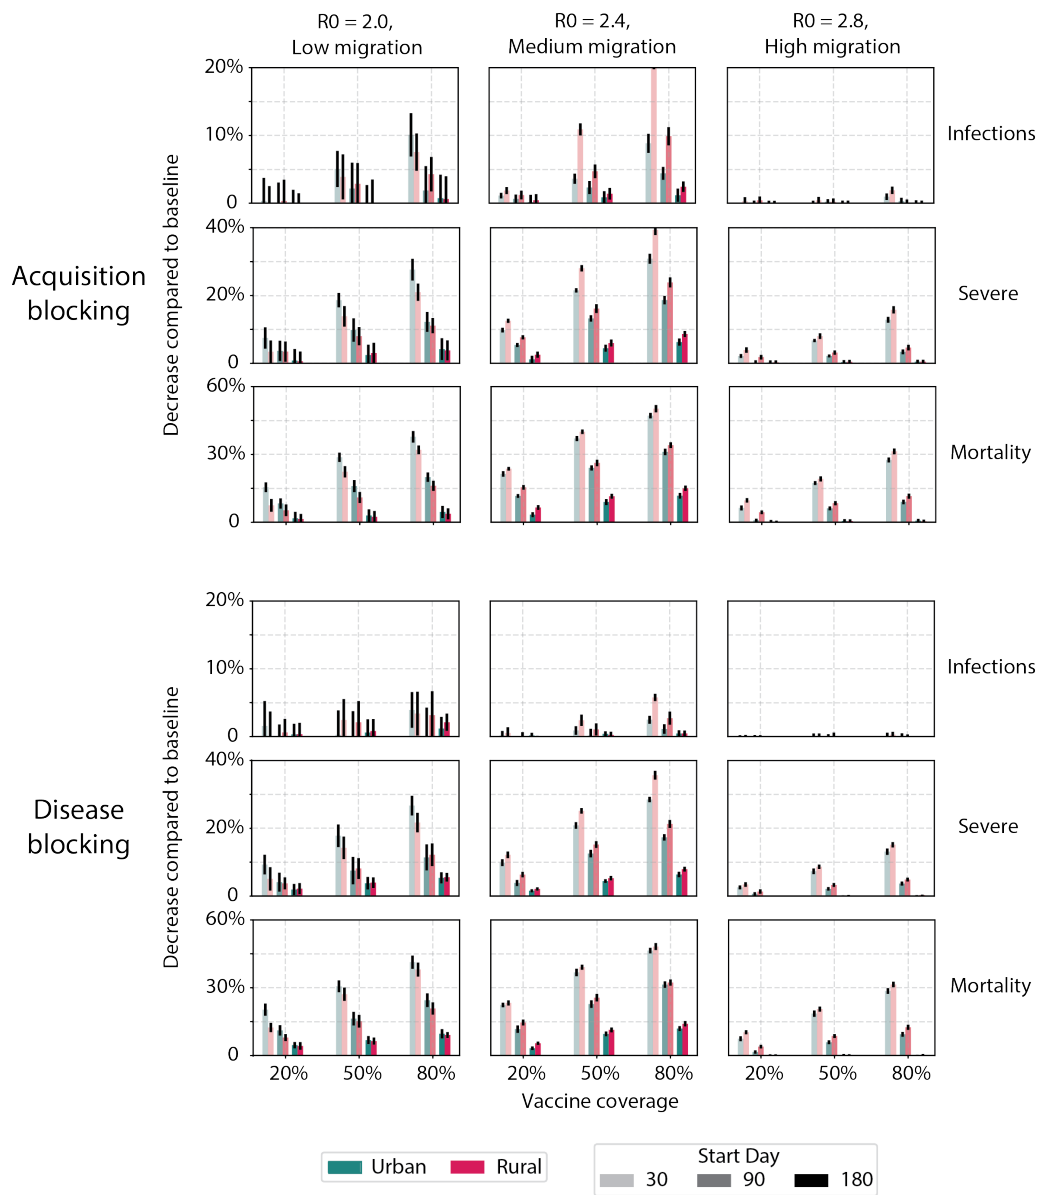

Figure 5: Vaccination campaign impact on infections, severe cases and deaths by spatial (urban-rural) prioritization. Bars indicate mean reduction in respective cumulative indicator, and error bars indicate standard error.

215 the slow roll-out of vaccine over a 12-month period, particularly during the  
216 first 9 months when <50% of the vaccine will have been distributed [17].

217 The differences between acquisition-blocking and disease-blocking vac-  
218 cines were reduced when impact was measured by severe cases and deaths  
219 (Figure 5). The acquisition-blocking vaccine resulted in 2-4% more severe  
220 cases averted than the disease-blocking vaccine across transmission scenarios  
221 due to the reduction in transmission (Figure 5, rows 2 and 5). However, the  
222 difference between vaccine types was negligible for deaths averted (Figure 5,  
223 rows 3 and 6). This was attributable to our assumption that both vaccines  
224 provide protection against severe disease and deaths and that age groups  
225 would be given priority over spatial distribution.

226 In all three transmission scenarios in Figure 5 as well as the remaining sce-  
227 narios (Supplemental Information), increased NPI/PHSM that also reduced  
228 migration maximized the impact of vaccination campaigns.

## 229 Discussion

230 By applying an agent-based model with discrete individuals, we found  
231 that ongoing urban-rural migration has the potential to extend COVID-19  
232 outbreaks in a SSA-like setting. With either low or high internal migration  
233 rates, our model predicted that a single incidence peak at the country level  
234 would follow introduction, predominated by cases in urban and rural areas,  
235 respectively. However, with intermediate migration rates, our model pre-  
236 dicted that an initial predominantly urban outbreak would be followed by a  
237 second rural outbreak, resulting in two peaks and extending the duration of  
238 the outbreak.

239 Each of these migration scenarios was in turn associated with a different  
240 optimal vaccination strategy. When migration rates were low (whether due  
241 to geography, NPI/PHSM, or other causes) and if the vaccine could be rolled  
242 out quickly, the optimal strategy was to target urban areas, preventing the  
243 predominantly urban outbreak. However, with higher rates of urban-rural  
244 migration, targeting rural areas resulted in greater impact and was the opti-  
245 mal strategy, consistent with the largely rural population in SSA. Delays in  
246 vaccination also resulted in rural prioritization becoming the optimal strat-  
247 egy, as urban areas experienced outbreaks faster than rural areas and a larger  
248 proportion of the population resided in rural areas.

249 The differences in impact between urban and rural prioritization strate-  
250 gies warrant consideration as countries begin vaccinating their populations in  
251 larger numbers. We are not aware of any NDVPs (such as made available on  
252 the WHO COVID-19 Partners Platform [18]) that distinguish between urban  
253 and rural areas, though a few countries such as Mexico are reportedly prior-  
254 itizing rural areas [19]. While WHO guidance on subnational allocation has  
255 been limited to equity or logistical considerations, possible effects on impact  
256 were not explored [7, 9, 8]. If resources are not intentionally directed to rural  
257 areas, urban allocation is likely to be the default strategy throughout SSA  
258 and other LMIC. For example, Ameyaw et al. examined Demographic and  
259 Health Survey data from 2010-2018 and found that children in urban areas  
260 were fully vaccinated at higher rates than their rural counterparts (by 53%  
261 to 41%, respectively) [20]. While we do not consider other mitigating factors  
262 such as the ease of distribution in urban areas, the question of whether to  
263 vaccinate a larger, immunologically naive rural population or a smaller, pre-



264 viously exposed urban population encapsulates what we expect is a dilemma  
265 that countries may be facing in the near future. In this study we found that  
266 vaccinating rural areas may have benefits beyond equity.

267 Spatial prioritization complemented other strategies such as prioritizing  
268 older adults, as recommended by official WHO guidance [2]. Prioritizing  
269 younger adults with a vaccine effective against acquisition reduced the over-  
270 all number of infections, but prioritizing older adults more greatly reduced  
271 severe cases and deaths. The inability of prioritizing younger age groups to  
272 prevent as many severe cases and deaths as prioritizing older age groups was  
273 ultimately due to the anticipated slow roll-out of vaccine. This in turn reflects  
274 current projections which foresee a 12-month roll-out to reach 20% coverage  
275 that is back-loaded; approximately 50% of the available doses is expected to  
276 come in the last three months [17]. This pace, even assuming coverage rates  
277 >20%, make it difficult to achieve herd immunity fast enough to prevent  
278 infections, severe cases, and deaths in older adults without direct targeting.  
279 These results are consistent with other recent models on COVID-19 vaccine  
280 impact [21, 4, 3].

281 Our model also supports the position that countries should begin their  
282 vaccination campaigns as soon as possible. Campaigns that started later had  
283 a limited capacity to make up for the delay in vaccination, even when higher  
284 coverage levels were assumed. In many scenarios, larger campaigns that  
285 started later resulted in more deaths than smaller campaigns that started  
286 earlier. This supports the urgency to direct vaccine to SSA as quickly as  
287 possible, a position espoused by COVAX [22], the African Union [23], and  
288 civil society [24].

289 One question that we did not address directly is which scenario currently  
290 best fits each country in SSA: which have high or low ongoing internal mi-  
291 gration, or high or low transmission? Because both of these parameters are  
292 abstracted in the model, we propose that a careful epidemiological assess-  
293 ment would be needed for each country to measure the outcome of ongoing  
294 migration if present: a high cumulative incidence in rural areas compared to  
295 urban areas. For example, this might be accomplished through serosurveys  
296 as in Niger State in Nigeria [12] or through genomic surveillance to track  
297 variants as in South Africa [25], Nigeria [26], and Kenya [27]. Both studies  
298 showed that infections spread from urban centers to rural areas and that ru-  
299 ral areas were slower to see increases in incidence, consistent with a degree of  
300 restricted migration. Both countries and others in SSA may still have large  
301 immunologically naive populations in rural areas.

302 Our model was informed by a mix of historical data but plausibly rep-  
303 resents a future scenario. For example, while almost all SSA countries saw  
304 initial outbreaks during the year 2020, the example of Manaus, Brazil demon-  
305 strates how new variants may evade even high levels of existing immunity  
306 [28]. In such situations, future outbreaks may continue to resemble new  
307 outbreaks, leading to successive almost-memoryless incidence peaks. In ad-  
308 dition, the vaccine roll-out in SSA has been limited thus far, making our  
309 assumption reasonable that future vaccinations will essentially be starting  
310 anew. As of June 2021, the Africa CDC reported that less than 2% of mem-  
311 ber country populations received at least one dose of any vaccine and less  
312 than 0.5% have been fully vaccinated [29]. Therefore, variants and low ex-  
313 isting vaccine-induced immunity suggest our model and other outbreak-type

314 models will continue to have relevance.

315 Our study had several limitations. As an abstraction of a SSA country  
316 setting, our model represents an average in many respects: demographics  
317 (ages, contact patterns, urban-rural localization), COVID-19 response (as  
318 tracked by Oxford CGRT [30]), and a generic urban-seeded outbreak. This  
319 abstraction represents a trade-off that allowed us to focus on outbreak scenar-  
320 ios that may be applicable to many countries, though not precisely calibrated  
321 to any particular country. Our model also had several parameters that were  
322 abstractions of physical processes and not precisely matched to data. For ex-  
323 ample, internal migration did not correspond to a particular indicator such as  
324 mobile phone-based movement but represents an aggregate of this and other  
325 factors contributing to net migration [31]. We also made several simplifying  
326 assumptions on COVID-19 immunity and vaccines such as previous infection  
327 leading to perfect immunity and optimistic vaccine characteristics such as  
328 those based on mRNA vaccines [32, 33], as well as no opportunity for rein-  
329 fection. We also did not explicitly account for any particular SARS-CoV-2  
330 variants. However, by spanning a range of transmission rates, we accounted  
331 for increased infectiousness expected of new variants. In this case, our se-  
332 lected vaccine efficacy rates may represent best-case scenarios, with variants  
333 further reducing the impact on infections, severe cases, and deaths.

334 In sum, our model supports the position that countries should consider  
335 spatial prioritization among other factors when planning how to distribute  
336 COVID-19 vaccine, particularly those in SSA where vaccine supplies are ex-  
337 pected to be limited. These countries have an ongoing opportunity to adapt  
338 their strategy and if necessary set up an infrastructure that allows vaccine

339 to be prioritized to maximize impact.

## 340 **Methods**

### 341 *Model structure and demographics*

342 COVID-19 transmission dynamics were simulated using EMOD, a soft-  
343 ware platform for agent/individual-based epidemiological modeling of infec-  
344 tious diseases [34]. EMOD was used to represent an archetypal country  
345 in sub-Saharan Africa (SSA) [35] through demographics (age pyramid and  
346 urban-rural population distribution), contact structure, and mobility pat-  
347 terns. Demographics were represented by taking the mean of each five year  
348 age bin from the population pyramids in the SSA region [36]. The urban-rural  
349 distribution of the population was obtained from published UN estimates,  
350 and the mean was taken for all countries in SSA [15] (Figure 10). Contact  
351 structures for the same set of age bins and countries in urban and rural set-  
352 tings were obtained from Prem et al. [16]. These matrices were available for  
353 home, school, workplace, and community settings, and a simple mean was  
354 taken across SSA countries. To obtain the total contact matrices, we multi-  
355 plied the NPI policy effect from the Oxford COVID-19 Government Response  
356 Tracker described below and then summed all four settings together. Mobil-  
357 ity patterns represented the within-country movement of people as described  
358 below. Baseline parameter values are provided in Table 1 except for contact  
359 matrices which are provided in Supplemental Methods.

360 Individuals were created at model initialization and assigned (a) an age to  
361 match the desired age distribution and (b) a node representing either urban  
362 or rural settings to match the desired urban-rural population distribution.

363 In total the model contained 200 nodes with node<sub>1</sub> representing an urban  
364 setting and node<sub>2..200</sub> representing rural settings with the same population  
365 sizes at initialization (Figure 6). The urban node accounted for 40% of  
366 the total population, while the rural nodes accounted for the remaining 60%.  
367 This node structure was chosen to represent an SSA country having a capital  
368 city serving as the main hub of international traffic and rural areas whose  
369 residents travel to the capital city and other rural towns. Migration between  
370 urban and rural nodes and between rural nodes was represented as a change  
371 in the node assignment of individuals. The probability of a change in node  
372 was calculated as the product of a base rate and the population sizes of  
373 each pair of nodes, i.e., using a gravity-based model (Figure 6). The base  
374 migration rate was not known a priori, so a range of values were evaluated  
375 spanning several orders of magnitude (Table 1). This rate and other rates  
376 in the model were implemented as exponentially distributed waiting times  
377 between random events. Other demographic processes such as births, non-  
378 disease deaths, and migration to other countries were assumed negligible on  
379 the timescale of the model. The model was run for a simulated 2-year (730  
380 day) duration.

### 381 *COVID-19 epidemiology in the model*

382 We represented COVID-19 outbreaks where an infected case was intro-  
383 duced into a population that did not have pre-existing immunity (as hap-  
384 pened in year 2020) or where a new SARS-CoV-2 variant might be intro-  
385 duced that completely evades existing immunity. Individuals (agents) were  
386 assumed to be in one of the following states: susceptible, infected, or re-  
387 moved (recovered or dead). Infected individuals were seeded in the urban

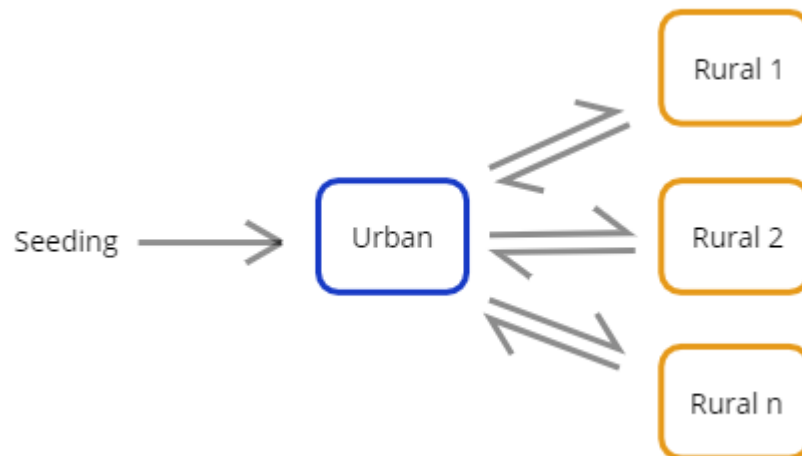

Figure 6: Model schematic showing sample node and migration. Infected individuals were seeded in the urban node and infection spread to rural nodes via urban-rural migration.

| Symbol      | Parameter                          | Units                           | Baseline value   | Range              | Reference |
|-------------|------------------------------------|---------------------------------|------------------|--------------------|-----------|
| $S_{t=0}$   | Initial susceptible prop           | Percent                         | 99.9             | NA                 | NA        |
| $I_{t=0}$   | Initial infected prop              | Percent                         | 0.1              | NA                 | NA        |
| $R_{t=0}$   | Initial removed prop               | Percent                         | 0                | NA                 | NA        |
| $R_0$       | Base reproduction number           | New infections / infected indiv | 2.4              | 2.0 - 2.8          | NA        |
| $NPI_t$     | NPI intensity effect               | Unitless multiplier             | Varies           | 0 - 100            | [30]      |
| $\gamma$    | (Avg infec duration) <sup>-1</sup> | Days <sup>-1</sup>              | 14 <sup>-1</sup> | NA                 | [37]      |
| $VE_S$      | Vax effic vs infec                 | Scalar                          | 0.95             | {0.95, 0}          | [32, 33]  |
| $VE_I$      | Vax effic vs trans                 | Scalar                          | 0.3              | {0, 0.7}           | NA        |
| $VE_P$      | Vax effic vs progr                 | Scalar                          | 1.0              | {0, 1.0}           | [32, 33]  |
| $P_{vac}$   | Final vax coverage                 | Percent                         | 50               | {20, 50, 80}       | [2]       |
| $p_{rural}$ | Rural pop                          | Percent                         | 60               | NA                 | [15]      |
| $b$         | Baseline migration                 | Probability / time step         | 20 000 dtpmi     | 20 - 200 000 dtpmi | NA        |
| $N_{tot}$   | Model agents                       | Integer                         | $4 \times 10^5$  | NA                 | NA        |
| $n_{rural}$ | Rural nodes                        | Integer                         | 199              | NA                 | NA        |
| $n_{urban}$ | Urban nodes                        | Integer                         | 1                | NA                 | NA        |
| $t$         | Time step                          | Days                            | 1                | NA                 | NA        |

Table 1: Model parameters

388 node at multiple time points (Table 1) during the first 60 days after which  
 389 no additional importations were assumed to occur due to suspension of air

390 travel. Susceptible individuals became infected at a rate proportional to a  
391 baseline rate of transmission  $R_0 I(t)/c_{i,j}\gamma$  where  $R_0$  represents the base repro-  
392 duction number of COVID-19 from literature (Table 1),  $I(t)$  the number of  
393 infected individuals in the same node,  $c_{i,j}$  the mean contact rate of individ-  
394 uals of age groups  $i$  and  $j$ , and  $\gamma =$  mean infectious duration in the model.  
395  $c_{i,j}$  was obtained from the age- and location-dependent contact rates from  
396 Prem et al. [16] across settings and countries in SSA. Infected individuals  
397 transitioned to the removed state with the sum rate of recovery and death,  
398 i.e., the inverse of the total infectious duration. Removed individuals did  
399 not return to the susceptible state which was equivalent to (a) births and  
400 deaths being negligible on the timescale of the model and (b) recovered in-  
401 dividuals having perfect immunity that did not wane on the timescale of the  
402 model. Individual-level behaviors were also simulated to a limited extent:  
403 10% of infected individuals were assumed to self-isolate which reduced their  
404 contributions to transmission in their respective node by 80%.

#### 405 *Country-level events and policies in the model*

406 To represent typical country-level policies to outbreaks, we included a  
407 quantification of NPI/PHSM policy strengths implemented in SSA since early  
408 2020. We obtained data from the Oxford COVID-19 Government Response  
409 Tracker (OxCGRT) Containment and Health Index which is the average of  
410 14 sub-indexed indicators ranging between 0 and 100 where each sub-index  
411 rates a specific type of policy on each day [30]. Dates in OxCGRT were  
412 re-scaled to the date since first case reported to the WHO ([38], Table 2).  
413 To derive a mean value for SSA, we used the mean  $NPI_t$  across countries  
414 in SSA for each date since respective first case 7.  $(1 - NPI_t/100)$  was used

415 as a contact rate multiplier for work and community settings. The school  
416 settings was assumed to be closed (i.e., with  $NPI_t = 100$ ) for 135 days  
417 after first reported case then reopened with the same contact rate multiplier  
418 as work and community settings. The home setting was assumed to have  
419 increased contact rates by 25% (i.e., with  $NPI_t = -25$ ). After the last day  
420 of available  $NPI_t$  data, work, school, and community settings were assumed  
421 to be opened to 75% of pre-COVID levels (i.e., with  $NPI_t = 25$ ) to simulate  
422 near-complete reopening in most SSA countries. We used the same multiplier  
423  $(1 - NPI_t/100)$  on migration between all spatial nodes in the simulation to  
424 account for changes in migration because of NPI policies.

| Calendar day | Epidemic day ( $t$ ) | Event or policy                                 |
|--------------|----------------------|-------------------------------------------------|
| 15           | -60                  | Importations begin                              |
| 75           | 0                    | Earliest policies (assumed first reported case) |
| 90           | 15                   | Importations stop                               |
| 105 – 255    | 30 – 180             | Vaccinations begin                              |
| 210          | 135                  | Schools reopen                                  |

Table 2: Summary of events and policy implementation dates in model. Calendar day 0 = January 1, 2020

#### 425 *Vaccination in the model*

426 COVID-19 vaccines in the model were represented as protecting individ-  
427 uals by one of the following mechanisms:

- 428 1. Acquisition-blocking: preventing susceptible individuals from becoming  
429 infected (called efficacy against susceptibility,  $VE_S$  in the biostatistical  
430 literature [39])
- 431 2. Transmission-blocking: preventing shedding of infectious particles after  
432 infection (efficacy against infectiousness,  $VE_I$ , in the literature [39])



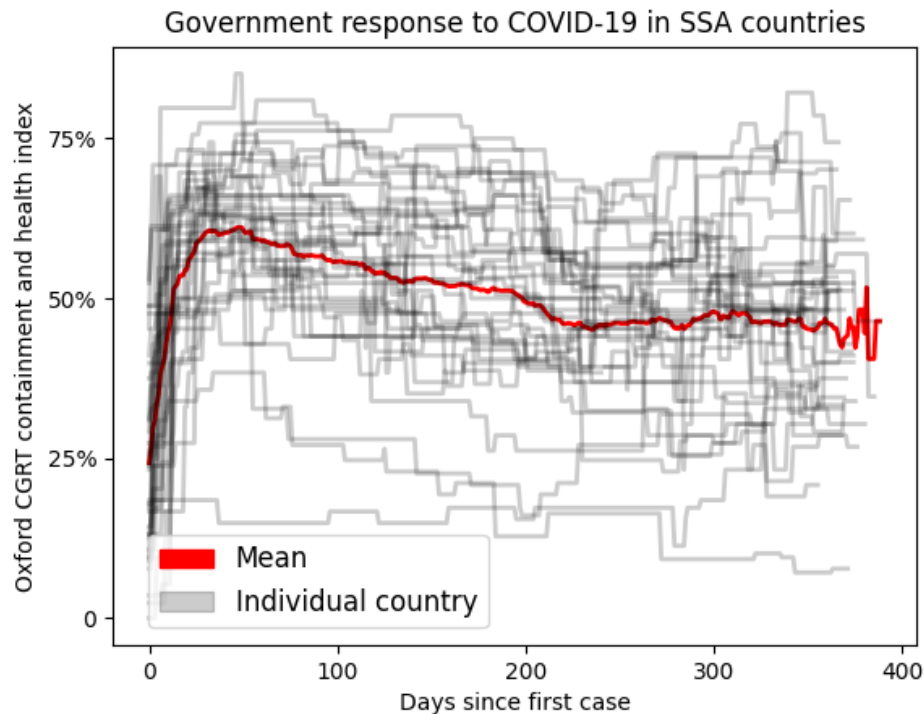

Figure 7: NPI policies as scored by OxCGRT for SSA countries

433 3. Disease-blocking: preventing individuals from developing symptomatic  
434 disease (efficacy against symptomatic illness,  $VE_P$ , in the literature  
435 [39])

436 We assumed that vaccines would be highly efficacious and comparable to  
437 the Pfizer/BioNTech or Moderna mRNA vaccines with  $>90\%$  clinical trial  
438 efficacy and effectiveness [32, 33]. We also made the simplifying assumption  
439 that observed efficacy  $VE_{obs}$  was entirely attributable to either  $VE_S$  or  $VE_I$   
440 (see 1). That is, for an acquisition-blocking vaccine, we assumed  $VE_S =$   
441  $VE_{obs}$  and  $VE_P = 1$  resulting in all of the vaccinated individuals being  
442 protected from disease progression despite infection. For a disease-blocking

443 vaccine, we assumed  $VE_I = VE_{obs}$ ,  $VE_P = 1$ , again resulting in all of  
444 the vaccinated individuals being protected from disease progression, even  
445 if infected. Thus all vaccines, regardless of type, were assumed to prevent  
446 severe disease and mortality. In the case of vaccines with lower efficacy, the  
447 preventive effect on severe disease and deaths is also assumed to decrease  
448 linearly. Finally, as our focus was on factors under the control of country  
449 policymakers, we did not explicitly model SARS-CoV-2 variants or their  
450 impact on vaccine efficacy. However, we expect that variants would have the  
451 net effect of reducing impact similar to reduced coverage levels.

452 Vaccine availability followed the COVAX projections of vaccine supply  
453 available from GAVI [17]. Briefly these projections assume vaccine will be-  
454 come increasingly available over a period of 12 months until reaching a final  
455 vaccination population coverage of  $P_{vac} = 20\%$  or greater (Table 1).

456 Different age prioritization schemes were assumed to be available: oldest  
457 first (in order: 70+ years, 60-69, 50-59, and 15-49), youngest first (in order:  
458 15-49 years, 50-59, 60-69, and 70+), or random (all ages at the same time)  
459 (Figure 9). Likewise, different spatial allocation schemes were assumed vi-  
460 able: urban first, rural first, or random (equal priority to urban and rural ar-  
461 eas) (Figure 9). Under random spatial prioritization, vaccine was distributed  
462 to urban and rural nodes at a rate proportional to population size, e.g., at 1%  
463 coverage, both 1% of the urban population and 1% of the rural population  
464 would be covered. In the case of both age and spatial prioritization, age was  
465 assumed to take precedence before spatial (urban, rural) setting.

466 At the individual (agent) level, if an individual was selected to receive a  
467 vaccine, each dose was assumed to confer an increasing level of protection

468 until the level of protection specified by  $VE_S$ ,  $VE_I$ , or  $VE_P$  was attained  
469 (Figure 8). This profile was chosen to reflect the Moderna scheduling of  
470 28 days between first and second doses [33]. Individual efficacy (regardless  
471 of type) was assumed to begin at 0% on day 0 and increase linearly until  
472 reaching 80% of final efficacy on day 10. This was maintained until day  
473 28 when a second dose was assumed administered, then efficacy increased  
474 linearly until final efficacy was reached on day 35. We assumed that all  
475 individuals selected for vaccination would receive both vaccine doses and  
476 that individual protection would not wane on the timescale of the model.  
477 Vaccination scenarios in the model used the same random number draws as  
478 baseline scenarios so that the individual- and population-level characteristics  
479 were the same until the vaccination campaign began. Each scenario was  
480 run with 40 realizations to derive mean and standard deviation of summary  
481 statistics.

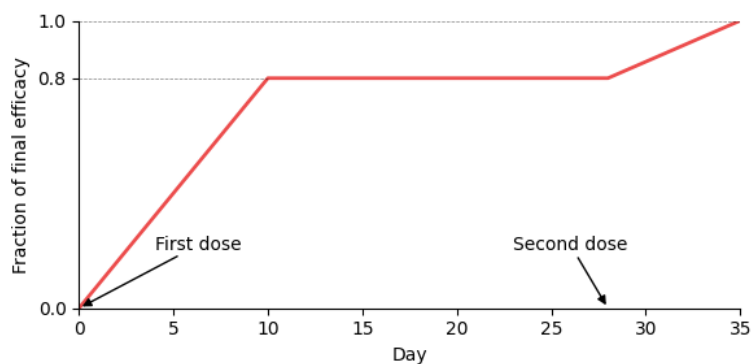

Figure 8: Ramp-up of protective effect within a vaccinated individual in the model

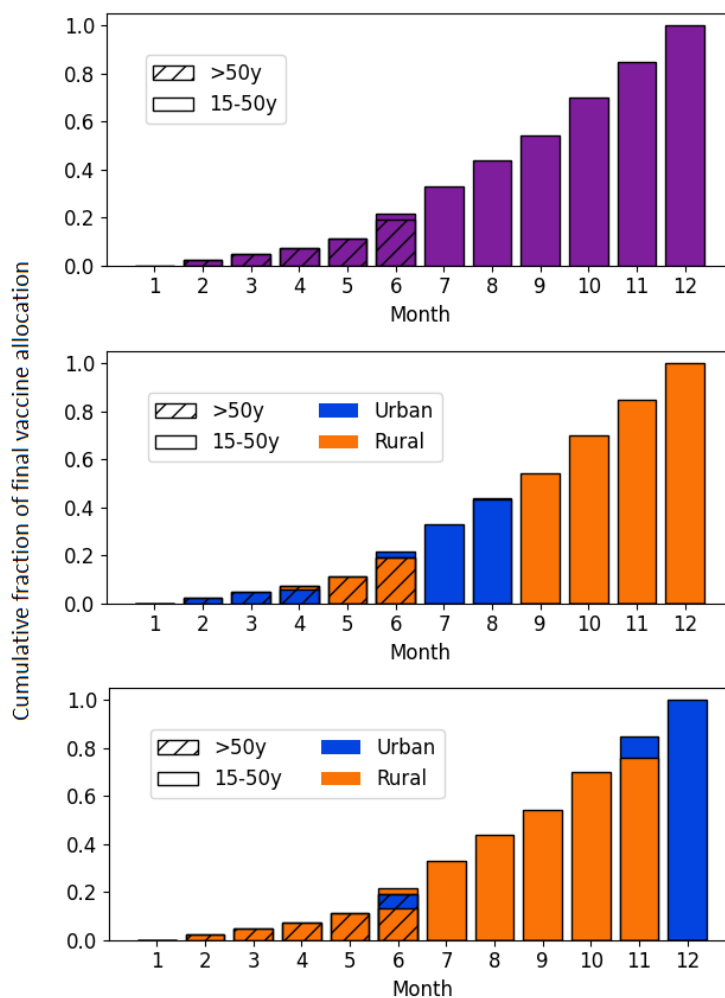

Figure 9: Vaccine allocation scenarios by spatial prioritization, age group, and month

482 *Parameter ranges for scenarios*

483 We evaluated vaccine distribution scenarios over a range of base trans-  
 484 mission intensities represented by  $R_0$  and migration rates. In the scenarios  
 485 presented,  $R_0$  varied between 2.0 to 2.8. Migration varied from a scenario  
 486 where simulated agents make 2000 daily trips per million individuals (dtpmi)

487 under unmitigated (no NPI/PHSM) conditions to a high migration scenario  
488 where 200 000 trips are completed each day.

489 With respect to vaccine distribution, we evaluated different final coverage  
490 levels and vaccine distribution start times in addition to different age and  
491 spatial prioritization strategies in urban and rural areas. Coverage levels were  
492 varied from 20%-80% of the total population, while start times were varied  
493 between 30-180 days after the first case. While the same start times were used  
494 across different transmission scenarios, the number of infected individuals  
495 varied depending on transmission intensity preceding the start of vaccine  
496 distribution. Vaccine distribution start times could thus be considered a  
497 proxy for different levels of population immunity at the start of a vaccination  
498 campaign.

499 Contact structure, age pyramid, and government response tracker data  
500 were available for 37 countries in sub-Saharan Africa, and all 37 countries  
501 (shown in Figure 10) were used to develop a representative SSA country. A  
502 full list of countries is available upon request.

### 503 **Acknowledgments**

504 The authors would like to thank Jonathan Bloedow and Christopher Lor-  
505 ton from the Bill and Melinda Gates Foundation for software support and  
506 Bob Small and Amol Chaudhari from the Coalition for Epidemic Prepared-  
507 ness Innovations and the WHO SAGE Working Group on Covid-19 Vaccines  
508 for informative discussions. This publication is based on research conducted  
509 by the Institute for Disease Modeling at the Bill and Melinda Gates Foun-  
510 dation. No external funding was involved.

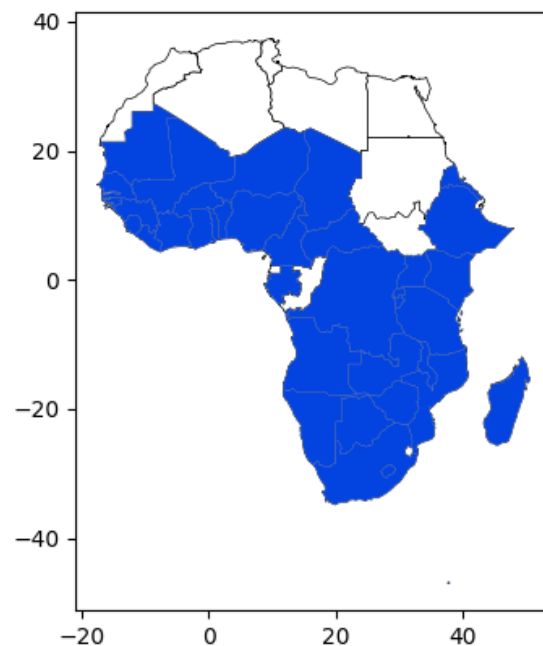

Figure 10: Sub-Saharan African countries that were aggregated to form a representative country.

511 **Supporting information**

512 Supplementary figures: `Supplementary_figures.pdf`.

513 All code to reproduce the modeling results are available on Github or by  
514 request to the authors.

515 **Author contributions statement**

516 P.S., B.W., D.L.C., and S.C. conceived the model scenarios. P.S. designed  
517 and implemented the model and generated model outputs. S.C. and P.S.

518 wrote the manuscript. All authors reviewed the manuscript.

## 519 **References**

- 520 [1] World Health Organization. Status of COVID-19 Vac-  
521 cines within WHO EUL/PQ evaluation process. Geneva:  
522 World Health Organization; 2021. Available from: [https://extranet.who.int/pqweb/key-resources/documents/  
523 status-covid-19-vaccines-within-who-eulpq-evaluation-process.](https://extranet.who.int/pqweb/key-resources/documents/status-covid-19-vaccines-within-who-eulpq-evaluation-process)
- 525 [2] Fair allocation mechanism for COVID-19 vaccines  
526 through the COVAX Facility; 2021. Available  
527 from: [https://www.who.int/publications/m/item/  
528 fair-allocation-mechanism-for-covid-19-vaccines-through-the-covax-facility.](https://www.who.int/publications/m/item/fair-allocation-mechanism-for-covid-19-vaccines-through-the-covax-facility)
- 529 [3] Bubar KM, Reinholt K, Kissler SM, Lipsitch M, Cobey S, Grad  
530 YH, et al. Model-informed COVID-19 vaccine prioritization strate-  
531 gies by age and serostatus. *Science*. 2021 Feb 26;371(6532):916–921.  
532 doi:10.1126/science.abe6959.
- 533 [4] Hogan AB, Winskill P, Watson OJ, Walker PGT, Whittaker C, Baguelin  
534 M, et al. Within-country age-based prioritisation, global allocation,  
535 and public health impact of a vaccine against SARS-CoV-2: A math-  
536 ematical modelling analysis. *Vaccine*. 2021 May 21;39(22):2995–3006.  
537 doi:10.1016/j.vaccine.2021.04.002.
- 538 [5] Verity R, Okell LC, Dorigatti I, Winskill P, Whittaker C, Imai N,  
539 et al. Estimates of the severity of coronavirus disease 2019: a model-

- 540 based analysis. *The Lancet Infectious Diseases*. 2020 Jun;20(6):669–677.  
541 doi:10.1016/S1473-3099(20)30243-7.
- 542 [6] Levin AT, Hanage WP, Owusu-Boaitey N, Cochran KB, Walsh SP,  
543 Meyerowitz-Katz G. Assessing the age specificity of infection fatality  
544 rates for COVID-19: systematic review, meta-analysis, and public policy  
545 implications. *European Journal of Epidemiology*. 2020 Dec;35(12):1123–  
546 1138. doi:10.1007/s10654-020-00698-1.
- 547 [7] Guidance on developing a national deployment and vaccination plan for  
548 COVID-19 vaccines. Geneva: World Health Organization; 2021. Avail-  
549 able from: [https://www.who.int/publications-detail-redirect/  
550 WHO-2019-nCoV-Vaccine\\_deployment-2020.1](https://www.who.int/publications-detail-redirect/WHO-2019-nCoV-Vaccine_deployment-2020.1).
- 551 [8] COVID-19 national deployment and vaccination plan: Submission  
552 and review process, 29 January 2021. Geneva: World Health  
553 Organization; 2021. Available from: [https://www.who.int/  
554 publications-detail-redirect/WHO-2019-nCoV-NDVP-country\\_  
555 plans-2021.1](https://www.who.int/publications-detail-redirect/WHO-2019-nCoV-NDVP-country_plans-2021.1).
- 556 [9] COVID-19 vaccination: supply and logistics guidance.  
557 Geneva: World Health Organization; 2021. Available from:  
558 [https://www.who.int/publications-detail-redirect/  
559 who-2019-ncov-vaccine-deployment-logistics-2021-1](https://www.who.int/publications-detail-redirect/who-2019-ncov-vaccine-deployment-logistics-2021-1).
- 560 [10] Milleliri JM, Coulibaly D, Nyobe B, Rey JL, Lamontagne F, Hocqueloux  
561 L, et al. SARS-CoV-2 Infection in Ivory Coast: A Serosurveillance Sur-



- 562 vey among Gold Mine Workers. *American Journal of Tropical Medicine*  
563 *and Hygiene*. 2021;104(5). doi:10.4269/ajtmh.21-0081.
- 564 [11] Milleliri JM, Coulibaly D, Nyobe B, Rey JL, Lamontagne F, Hoc-  
565 queloux L, et al. Seroprevalence of anti-SARS-CoV-2 IgG anti-  
566 bodies among truck drivers and assistants in Kenya. medRxiv.  
567 2021;doi:10.1101/2021.02.12.21251294v1.
- 568 [12] Majiya H, Aliyu-Paiko M, Balogu V, Musa D, Salihu I, Kawu A,  
569 et al. Seroprevalence of COVID-19 in Niger State. medRxiv.  
570 2020;doi:10.1101/2020.08.04.20168112.
- 571 [13] Mukwege D, Byabene AK, Akonkwa EM, Dahma H, Dauby N,  
572 Buhendwa JPC, et al. High SARS-CoV-2 Seroprevalence in Health-  
573 care Workers in Bukavu, Eastern Democratic Republic of Congo. *Am J*  
574 *Trop Med Hyg*. 2021;104(4):1526–1530. doi:10.4269/ajtmh.20-1526.
- 575 [14] Sykes W, Mhlanga L, Swanevelder R, Glatt TN, Grebe E, Coleman C,  
576 et al. Prevalence of anti-SARS-CoV-2 antibodies among blood donors in  
577 Northern Cape, KwaZulu-Natal, Eastern Cape, and Free State provinces  
578 of South Africa in January 2021. *Res Sq*. 2021;doi:10.21203/rs.3.rs-  
579 233375/v1.
- 580 [15] United Nations, Department of Economic and Social Affairs, Popula-  
581 tion Division. *World urbanization prospects: the 2018 revision*. United  
582 Nations; 2019. OCLC: 1120698127.
- 583 [16] Prem K, van Zandvoort K, Klepac P, Eggo RM, Davies NG, Cook AR,  
584 et al. Projecting contact matrices in 177 geographical regions: an update

585 and comparison with empirical data for the COVID-19 era. medRxiv.  
586 2021;doi:<https://doi.org/10.1101/2020.07.22.20159772>.

587 [17] COVAX Global Supply Forecast;. Available from: <https://www.gavi.org/news/document-library/covax-global-supply-forecast>.

589 [18] COVID-19 Partners Platform;. Available from: <https://covid19partnersplatform.who.int/en/pillar10>.

591 [19] Mexico is vaccinating its poorest citizens first – against the  
592 advice of health experts. Washington Post. 2021;Available  
593 from: [https://www.washingtonpost.com/world/the\\_americas/mexico-coronavirus-vaccine-lopez-obrador/2021/02/25/81c28c50-76ad-11eb-9537-496158cc5fd9\\_story.html](https://www.washingtonpost.com/world/the_americas/mexico-coronavirus-vaccine-lopez-obrador/2021/02/25/81c28c50-76ad-11eb-9537-496158cc5fd9_story.html).

596 [20] Ameyaw EK, Kareem YO, Ahinkorah BO, Seidu AA, Yaya S. Decom-  
597 posing the rural–urban gap in factors associated with childhood immu-  
598 nisation in sub-Saharan Africa: evidence from surveys in 23 countries.  
599 BMJ Global Health. 2021 Jan;6(1):e003773. Available from: <https://gh.bmj.com/content/6/1/e003773>. doi:10.1136/bmjgh-2020-003773.

601 [21] Matrajt L, Eaton J, Leung T, Brown ER. Vaccine optimization  
602 for COVID-19: Who to vaccinate first? Sci Adv. 2020 Feb;7(6).  
603 doi:10.1126/sciadv.abf1374.

604 [22] COVAX Joint Statement: Call to action to equip  
605 COVAX to deliver 2 billion doses in 2021;. Avail-  
606 able from: <https://www.who.int/news/item/27-05-2021-covax-joint-statement-call-to-action-to-equip-covax-to-deliver-2-b>

- 608 [23] Communique of the High-Level Emergency Virtual Meeting of  
609 African Ministers of Health On the COVID-19 situation in  
610 Africa;. Available from: [https://africacdc.org/news-item/  
611 communique-of-the-high-level-emergency-virtual-meeting-of-african-ministers-o](https://africacdc.org/news-item/communique-of-the-high-level-emergency-virtual-meeting-of-african-ministers-o)
- 612 [24] Civil society to World Bank: Help us hold governments ac-  
613 countable in COVID-19 vaccine distribution; 2021. Avail-  
614 able from: [https://www.devex.com/news/sponsored/  
615 civil-society-to-world-bank-help-us-hold-governments-accountable-in-covid-19-](https://www.devex.com/news/sponsored/civil-society-to-world-bank-help-us-hold-governments-accountable-in-covid-19-)
- 616 [25] Happi AN, Ugwu CA, Happi CT. Tracking the emergence of  
617 new SARS-CoV-2 variants in South Africa. *Nature Medicine*.  
618 2021 Mar;27(3):372–373. Available from: [https://www.nature.com/  
619 articles/s41591-021-01265-1](https://www.nature.com/articles/s41591-021-01265-1). doi:10.1038/s41591-021-01265-1.
- 620 [26] Happi C, Ihekweazu C, Oluniyi PE, Olawoye I. SARS-CoV-2 genomes  
621 from Nigeria reveal community transmission, multiple virus lineages  
622 and spike protein mutation associated with higher transmission and  
623 pathogenicity. 2020;. Available from: [https://virological.org/t/  
624 sars-cov-2-genomes-from-nigeria-reveal-community-transmission-multiple-virus-  
625 494.](https://virological.org/t/sars-cov-2-genomes-from-nigeria-reveal-community-transmission-multiple-virus-)
- 626 [27] Githinji G. Introduction and local transmission of SARS-CoV-  
627 2 cases in Kenya;. Available from: [https://virological.org/t/  
628 introduction-and-local-transmission-of-sars-cov-2-cases-in-kenya/  
629 497.](https://virological.org/t/introduction-and-local-transmission-of-sars-cov-2-cases-in-kenya/)
- 630 [28] Sabino EC, Buss LF, Carvalho MPS, Prete CA, Crispim MAE,

- 631 Fraiji NA, et al. Resurgence of COVID-19 in Manaus, Brazil, de-  
632 spite high seroprevalence. *The Lancet*. 2021 Feb;397(10273):452–  
633 455. Available from: [https://www.thelancet.com/journals/lancet/  
634 article/PIIS0140-6736\(21\)00183-5/abstract](https://www.thelancet.com/journals/lancet/article/PIIS0140-6736(21)00183-5/abstract). doi:10.1016/S0140-  
635 6736(21)00183-5.
- 636 [29] COVID-19 Vaccination;. Available from: [https://africacdc.org/  
637 covid-19-vaccination/](https://africacdc.org/covid-19-vaccination/).
- 638 [30] Hale T, Webster S, Petherick A, Phillips T, Kira B. Oxford COVID-  
639 19 Government Response Tracker. Blavatnik School of Govern-  
640 ment; 2020. Available from: [https://www.bsg.ox.ac.uk/research/  
641 research-projects/covid-19-government-response-tracker](https://www.bsg.ox.ac.uk/research/research-projects/covid-19-government-response-tracker).
- 642 [31] Grantz KH, Meredith HR, Cummings DAT, Metcalf CJE, Grenfell  
643 BT, Giles JR, et al. The use of mobile phone data to inform anal-  
644 ysis of COVID-19 pandemic epidemiology. *Nat Commun*. 2020 Sep  
645 30;11(1):4961. doi:10.1038/s41467-020-18190-5.
- 646 [32] Polack FP, Thomas SJ, Kitchin N, Absalon J, Gurtman A, Lock-  
647 hart S, et al. Safety and Efficacy of the BNT162b2 mRNA Covid-19  
648 Vaccine. *New England Journal of Medicine*. 2020 Dec;383(27):2603–  
649 2615. Available from: <https://doi.org/10.1056/NEJMoa2034577>.  
650 doi:10.1056/NEJMoa2034577.
- 651 [33] Baden LR, El Sahly HM, Essink B, Kotloff K, Frey S, Novak  
652 R, et al. Efficacy and Safety of the mRNA-1273 SARS-CoV-2  
653 Vaccine. *New England Journal of Medicine*. 2021 Feb;384(5):403–

- 654 416. Available from: <https://doi.org/10.1056/NEJMoa2035389>.  
655 [doi:10.1056/NEJMoa2035389](https://doi.org/10.1056/NEJMoa2035389).
- 656 [34] Bershteyn A, Gerardin J, Bridenbecker D, Lorton CW, Bloedow J, Baker  
657 RS, et al. Implementation and applications of EMOD, an individual-  
658 based multi-disease modeling platform. *Pathog Dis*. 2018;76(5):fty059.  
659 [doi:10.1093/femspd/fty059](https://doi.org/10.1093/femspd/fty059).
- 660 [35] About Africa; 2021. Available from: [https://www.africa.undp.org/  
661 content/rba/en/home/regioninfo.html](https://www.africa.undp.org/content/rba/en/home/regioninfo.html).
- 662 [36] World Population Prospects - Population Division - United Nations;  
663 2021. Available from: [https://population.un.org/wpp/Download/  
664 Standard/Population/](https://population.un.org/wpp/Download/Standard/Population/).
- 665 [37] Ali ST, Wang L, Lau EHY, Xu XK, Du Z, Wu Y, et al. Se-  
666 rial interval of SARS-CoV-2 was shortened over time by nonphar-  
667 maceutical interventions. *Science*. 2020 Aug 28;369(6507):1106–1109.  
668 [doi:10.1126/science.abc9004](https://doi.org/10.1126/science.abc9004).
- 669 [38] WHO Coronavirus (COVID-19) Dashboard. Geneva: World Health Or-  
670 ganization; 2021. Available from: <https://covid19.who.int/info/>.
- 671 [39] Basta NE, Halloran ME, Matrajt L, Longini IM Jr. Estimating in-  
672 fluenza vaccine efficacy from challenge and community-based study  
673 data. *American Journal of Epidemiology*. 2008 Dec;168(12):1343–1352.  
674 [doi:10.1093/aje/kwn259](https://doi.org/10.1093/aje/kwn259).

## Government response to COVID-19 in SSA countries

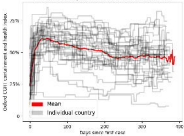

Country

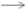

Urban

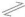

Rural 1

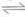

Rural 2

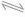

Rural 3

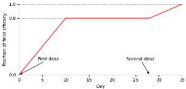



Cumulative fraction of final vaccine allocation

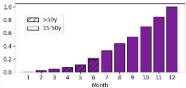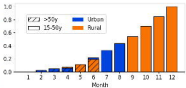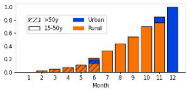

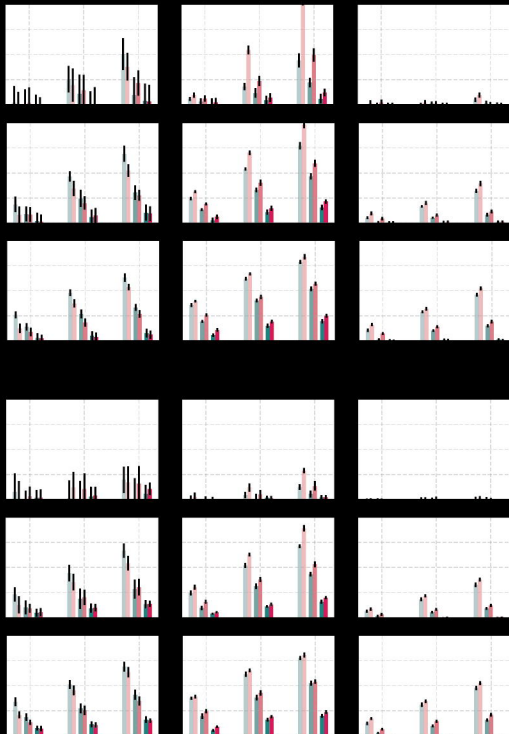

Urban Rural

Start Day  
30 90 180

|      |      |     |     |     |      |
|------|------|-----|-----|-----|------|
| 16.0 | 11.0 | 7.0 | 5.0 | 3.0 | 2.0  |
| 13.0 | 9.0  | 7.0 | 4.0 | 3.0 | 2.0  |
| 11.0 | 7.0  | 6.0 | 4.0 | 3.0 | 2.0  |
| 8.0  | 6.0  | 5.0 | 3.0 | 2.0 | 1.0  |
| 6.0  | 5.0  | 3.0 | 3.0 | 1.0 | 1.0  |
| 4.0  | 3.0  | 2.0 | 2.0 | 1.0 | 1.0  |
| 2.0  | 2.0  | 2.0 | 1.0 | 1.0 | -0.0 |

|      |      |      |      |      |     |
|------|------|------|------|------|-----|
| 36.0 | 28.0 | 20.0 | 16.0 | 11.0 | 8.0 |
| 33.0 | 25.0 | 20.0 | 14.0 | 11.0 | 7.0 |
| 30.0 | 23.0 | 18.0 | 14.0 | 10.0 | 6.0 |
| 26.0 | 20.0 | 16.0 | 11.0 | 8.0  | 5.0 |
| 22.0 | 17.0 | 13.0 | 9.0  | 7.0  | 4.0 |
| 17.0 | 13.0 | 10.0 | 7.0  | 5.0  | 3.0 |
| 12.0 | 10.0 | 7.0  | 5.0  | 4.0  | 2.0 |

|      |      |      |      |      |      |
|------|------|------|------|------|------|
| 51.0 | 41.0 | 33.0 | 26.0 | 19.0 | 14.0 |
| 47.0 | 38.0 | 32.0 | 24.0 | 18.0 | 12.0 |
| 44.0 | 36.0 | 30.0 | 23.0 | 17.0 | 11.0 |
| 41.0 | 34.0 | 26.0 | 20.0 | 15.0 | 10.0 |
| 37.0 | 29.0 | 23.0 | 17.0 | 12.0 | 8.0  |
| 33.0 | 24.0 | 19.0 | 14.0 | 10.0 | 7.0  |
| 23.0 | 19.0 | 14.0 | 11.0 | 8.0  | 5.0  |

|     |     |     |     |     |      |
|-----|-----|-----|-----|-----|------|
| 4.0 | 4.0 | 2.0 | 2.0 | 2.0 | 1.0  |
| 4.0 | 3.0 | 2.0 | 2.0 | 1.0 | 1.0  |
| 3.0 | 2.0 | 2.0 | 1.0 | 1.0 | 1.0  |
| 2.0 | 2.0 | 1.0 | 1.0 | 1.0 | 1.0  |
| 1.0 | 1.0 | 1.0 | 1.0 | 1.0 | -0.0 |
| 1.0 | 1.0 | 1.0 | 1.0 | 1.0 | -0.0 |
| 1.0 | 1.0 | 1.0 | 1.0 | 1.0 | -0.0 |

|      |      |      |      |      |     |
|------|------|------|------|------|-----|
| 33.0 | 27.0 | 20.0 | 15.0 | 11.0 | 7.0 |
| 30.0 | 24.0 | 18.0 | 14.0 | 10.0 | 6.0 |
| 28.0 | 21.0 | 16.0 | 12.0 | 9.0  | 6.0 |
| 23.0 | 19.0 | 14.0 | 11.0 | 8.0  | 5.0 |
| 20.0 | 16.0 | 12.0 | 9.0  | 7.0  | 4.0 |
| 16.0 | 13.0 | 9.0  | 7.0  | 5.0  | 3.0 |
| 12.0 | 9.0  | 6.0  | 5.0  | 4.0  | 2.0 |

|      |      |      |      |      |      |
|------|------|------|------|------|------|
| 51.0 | 42.0 | 33.0 | 26.0 | 20.0 | 13.0 |
| 48.0 | 40.0 | 32.0 | 25.0 | 18.0 | 12.0 |
| 47.0 | 38.0 | 29.0 | 23.0 | 17.0 | 11.0 |
| 40.0 | 34.0 | 25.0 | 20.0 | 15.0 | 10.0 |
| 36.0 | 31.0 | 24.0 | 17.0 | 13.0 | 8.0  |
| 31.0 | 24.0 | 20.0 | 16.0 | 10.0 | 7.0  |
| 24.0 | 18.0 | 14.0 | 10.0 | 8.0  | 5.0  |

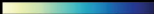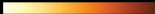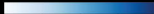

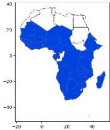

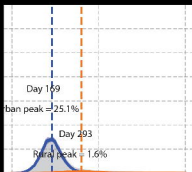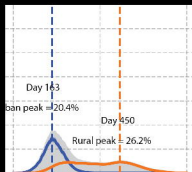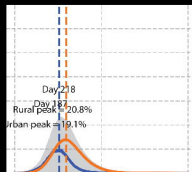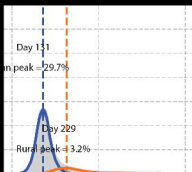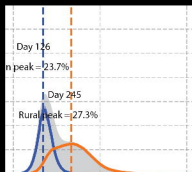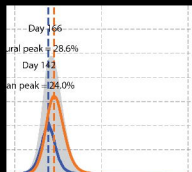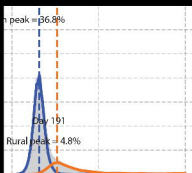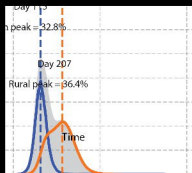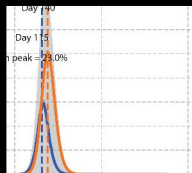

Total
  Urban
  Rural

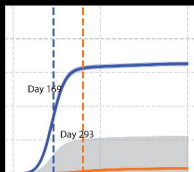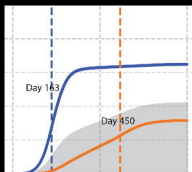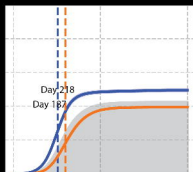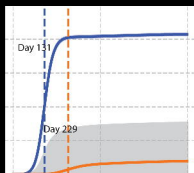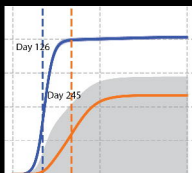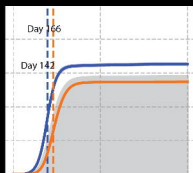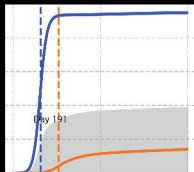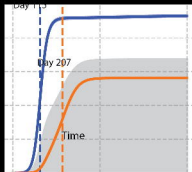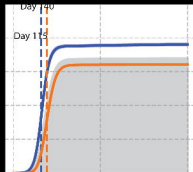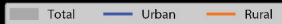

## Prioritizing distribution by age

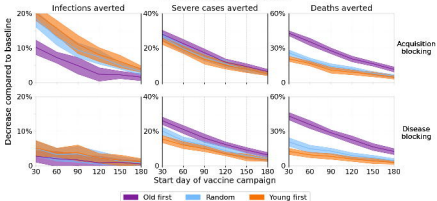

Source: https://medrxiv.org/content/10.1101/2021.06.18.21259164v1.full.pdf
